# Supplementary material for: Transition metal chalcogenide based MnSe heterostructured with NiCo2O4 as a new high performance electrode material for capacitive energy storage
Source: Royal Society of Chemistry journal article supplement (doi:10.1039/c9nj02711d), 2019-01-01
Supplement: c9nj02711d1.pdf [file c9nj02711d1.pdf]

# Transition metal chalcogenides based MnSe hetero structured with NiCo<sub>2</sub>O<sub>4</sub> as a new high performance electrode material for capacitive energy storage.

Vivekanandan Raman,<sup>a</sup> Deviprasath Chinnadurai,<sup>a</sup> Rajendiran Rajmohan,<sup>a</sup> Venkata Thulasivarma Chebrolu,<sup>a</sup> R Vinodh,<sup>a</sup> Hee-Je Kim<sup>\*a</sup>

<sup>a</sup>School of Electrical Engineering, Pusan National University, Busandaehak-ro 63 beon-gil, Geumjeong-gu, Busan, 46241, Republic of Korea. E-mail: heeje@pusan.ac.kr; Fax: +82 51 513 0212; Tel: +82 51 510 2364.

## Electrochemical calculations:

Specific capacity ( $C$ ) or specific capacitance ( $C_s$ ) were calculated from the GCD curves following the equations  $C = I \times \Delta t / m$  (for the MnSe, NiCo<sub>2</sub>O<sub>4</sub> and MnSe(20)/NiCo<sub>2</sub>O<sub>4</sub> electrodes) and  $C_s = I \times \Delta t / (m \times \Delta V)$  (for the MnSe, NiCo<sub>2</sub>O<sub>4</sub> and MnSe(20)/NiCo<sub>2</sub>O<sub>4</sub> electrodes), where  $I$  is the discharge current (A),  $\Delta t$  is the discharge time (S),  $m$  is the mass of the electroactive material in the electrode (g), and  $\Delta V$  is the total potential deviation (V). The specific energy and power were calculated for asymmetric device using following equations:

$$E = I \int_{t=0}^{t=t} V(t) dt$$

$$P = \frac{E}{t}$$

Where,  $E$  is the specific energy (W h kg<sup>-1</sup>),  $P$  is the specific power (W kg<sup>-1</sup>),  $I$  is the specific current (A g<sup>-1</sup>),  $V$  is the potential (V) and  $t$  is discharge time (S).<sup>1</sup>

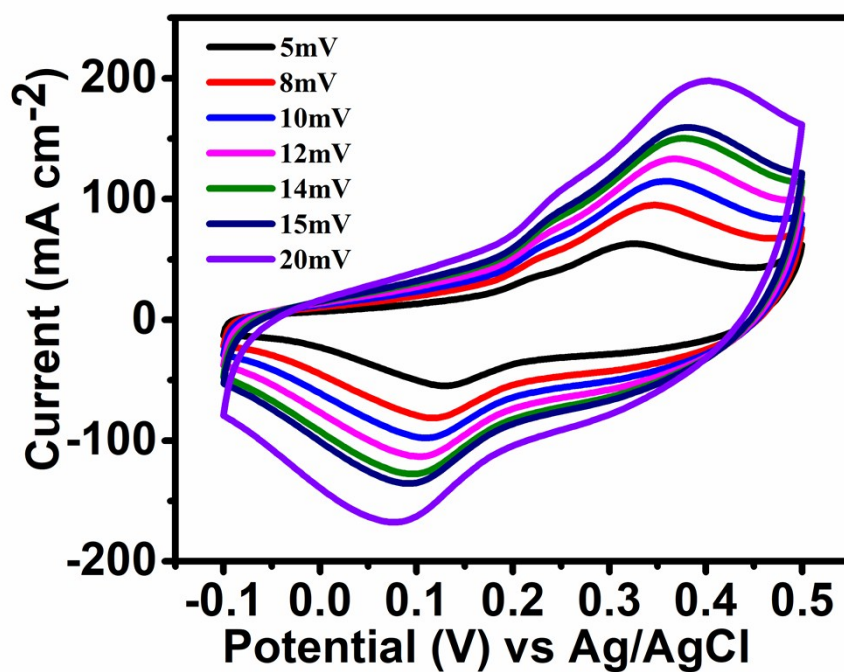

Fig S1. CV curves of MnSe(10)/NiCo<sub>2</sub>O<sub>4</sub>

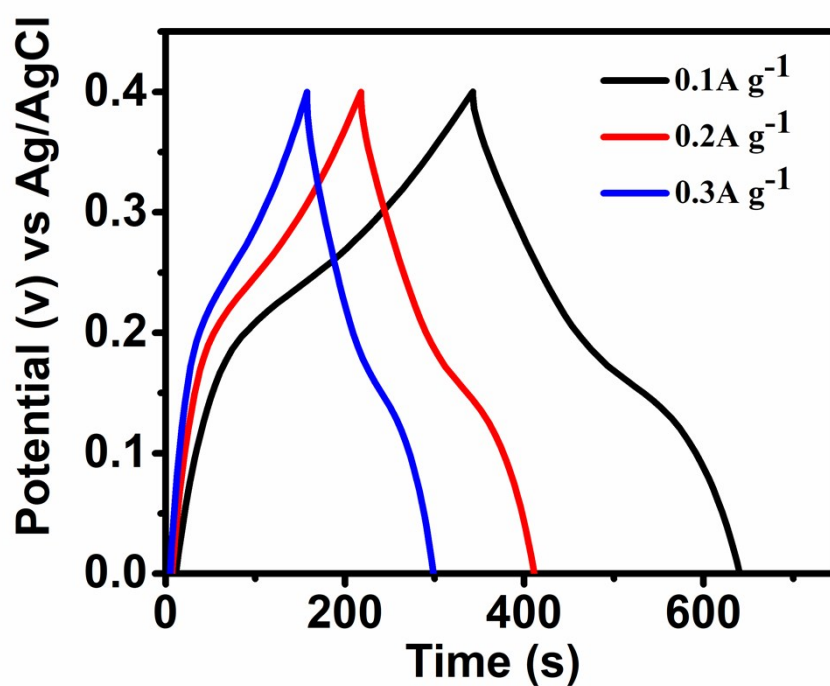

Fig S2. Charge-discharge curve of MnSe(10)/NiCo<sub>2</sub>O<sub>4</sub>.

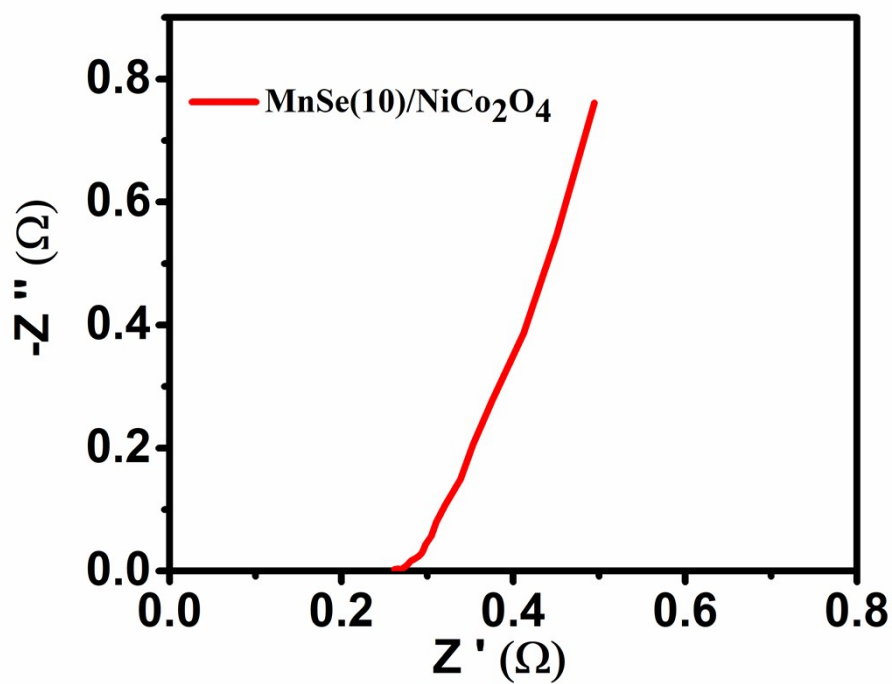

Fig S3. EIS spectra of MnSe(10)/NiCo<sub>2</sub>O<sub>4</sub>

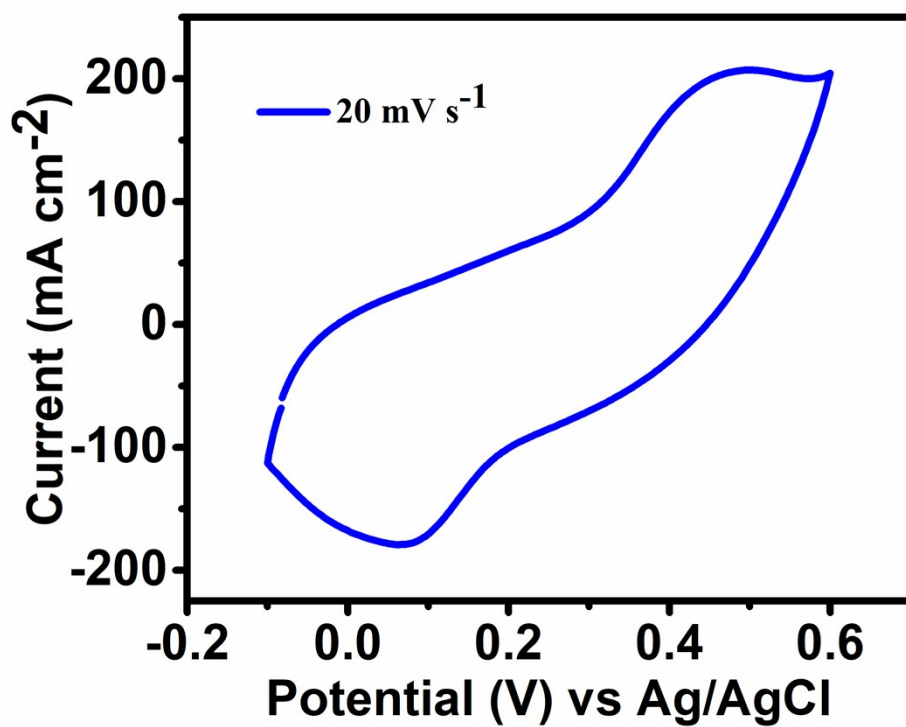

Fig S4. CV curve of MnSe(30)/NiCo<sub>2</sub>O<sub>4</sub>.

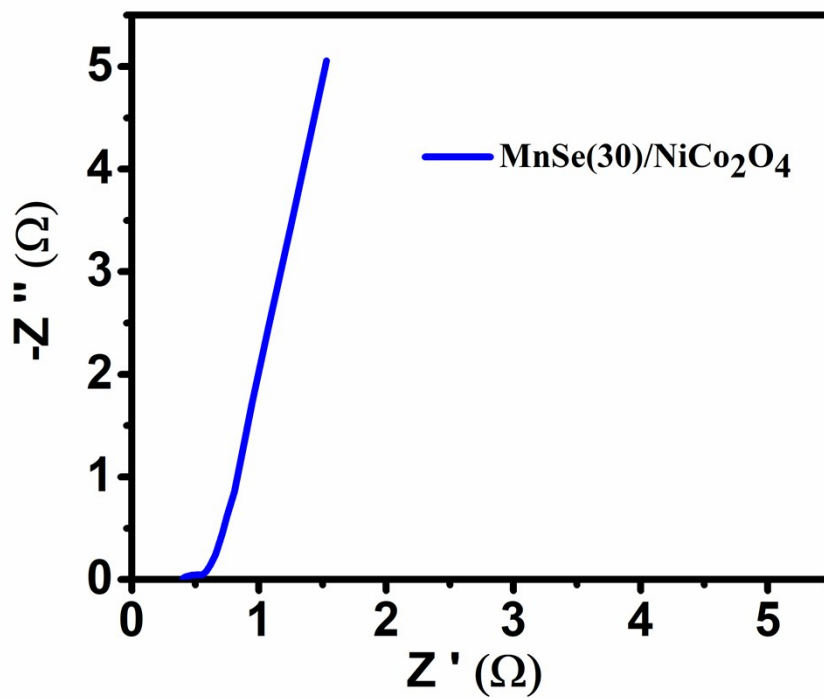

Fig S5. EIS spectra of MnSe(30)/NiCo<sub>2</sub>O<sub>4</sub>

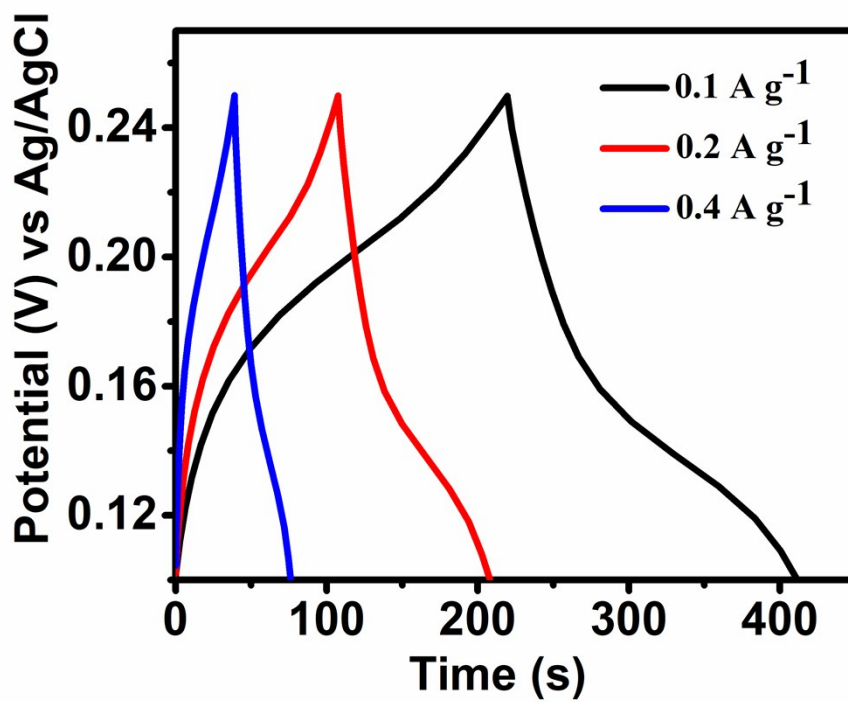

Fig S6. Charge-discharge curve of MnSe(30)/NiCo<sub>2</sub>O<sub>4</sub>

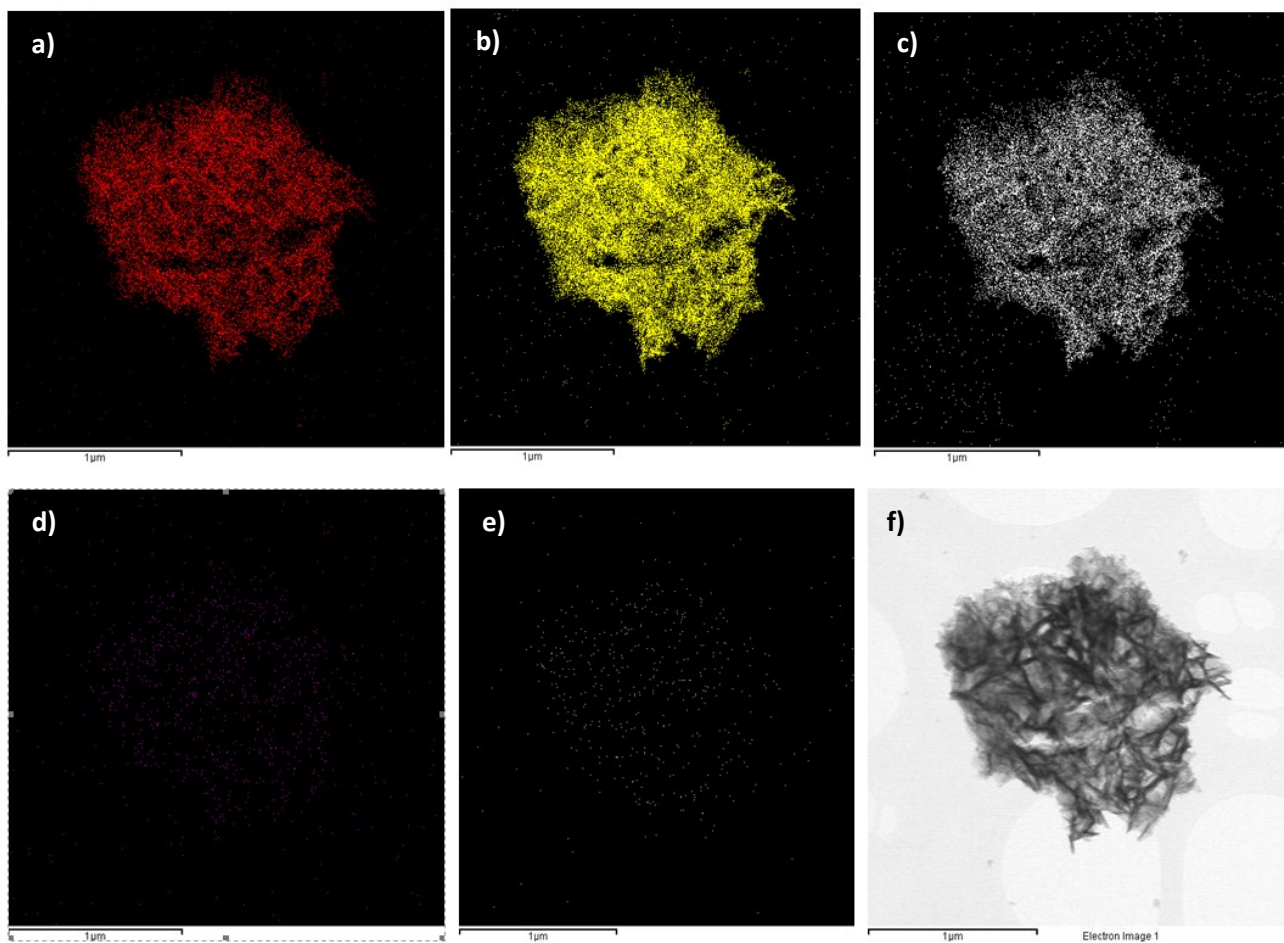

Fig S7. TEM EDS mapping of MnSe(20)/NiCo<sub>2</sub>O<sub>4</sub>

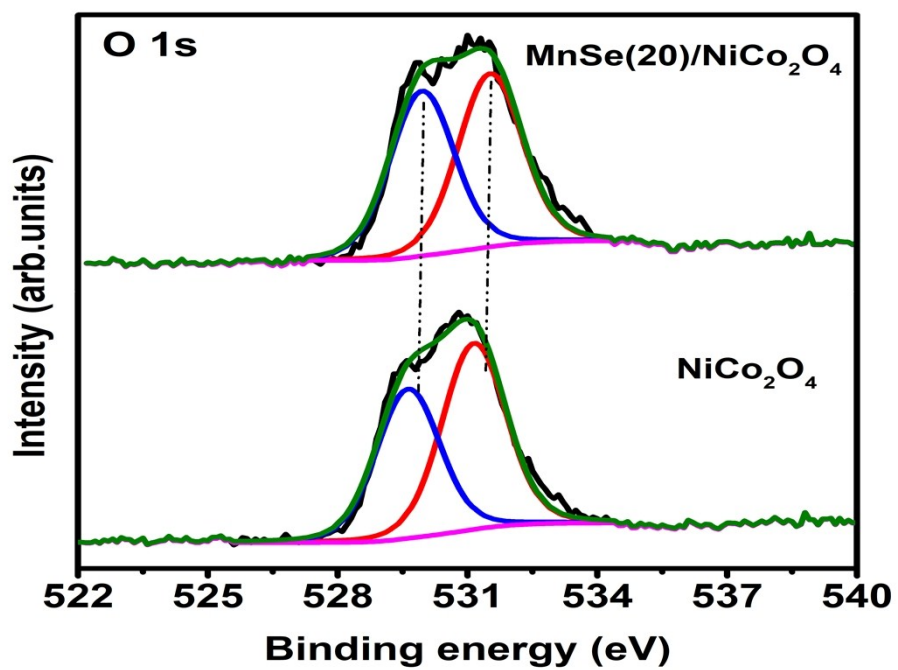

Fig S8. XPS spectra of O.

## References

- 1 J. Ding, H. Wang, Z. Li, K. Cui, D. Karpuzov, X. Tan, A. Kohandehghan and D. Mitlin, *Energy Environ. Sci.*, 2015, **8**, 941–955.
